# Supplementary figures and images for: FFAT motif phosphorylation controls formation and lipid transfer function of inter‐organelle contacts
Source: PubMed Central journal article supplement — EMBO J. 2020 Oct 30;39(23):e104369. doi: 10.15252/embj.2019104369 (PMC7705450; doi:10.15252/embj.2019104369), 2020-10-30

**Fig. 1C**

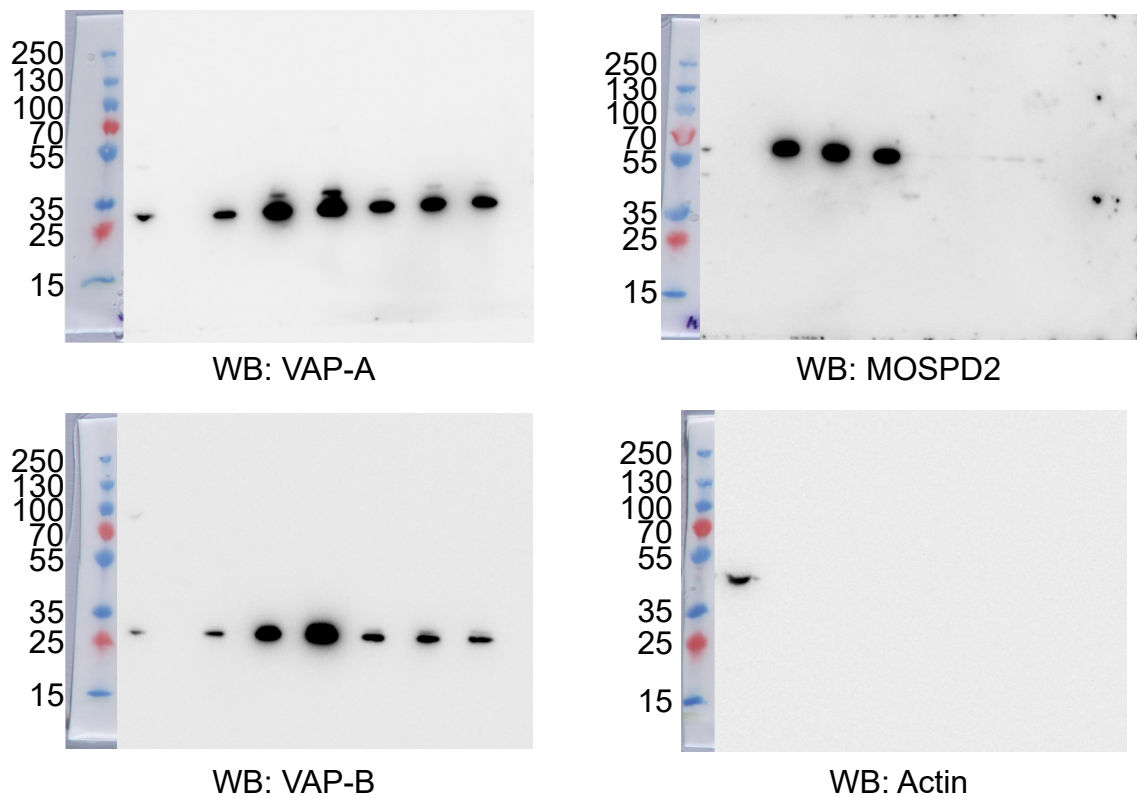

**Fig. 1D**

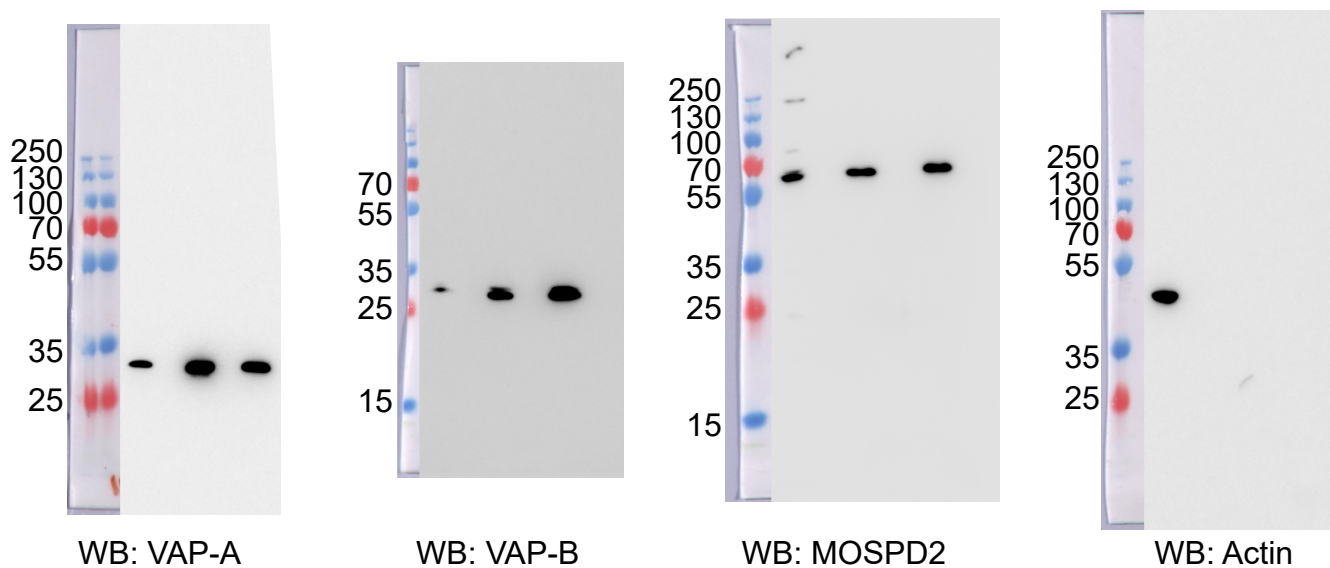

**Figure 1 Source data**

Supplement: EMBJ-39-e104369-s007.pdf [file EMBJ-39-e104369-s007.pdf]

**Fig. 2B**

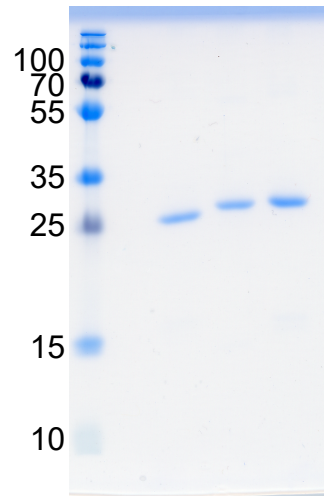

**Fig. 2C**

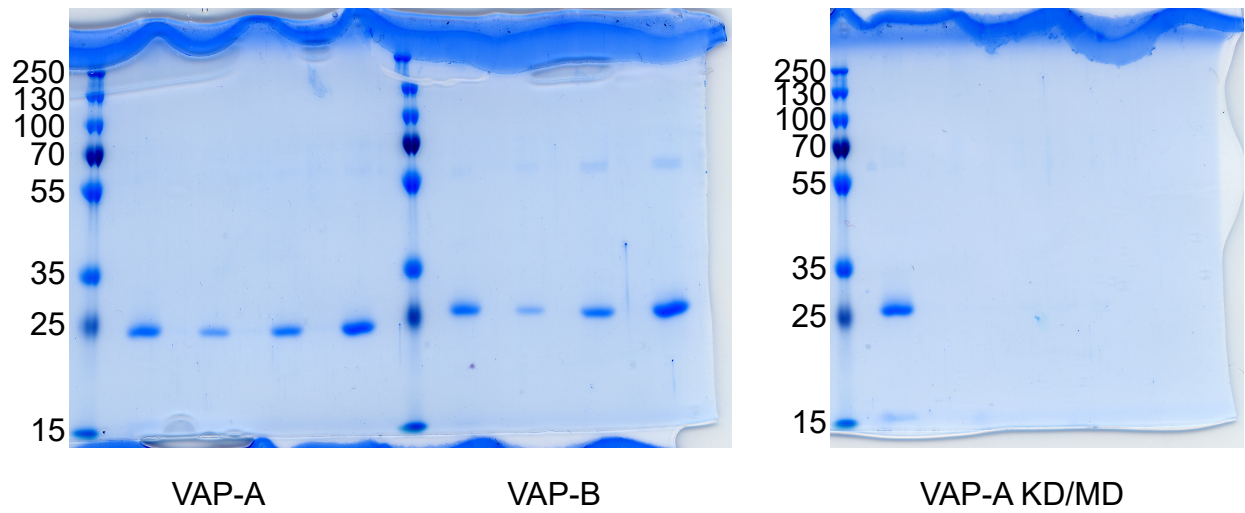

**Figure 2 Source data**

Supplement: EMBJ-39-e104369-s008.pdf [file EMBJ-39-e104369-s008.pdf]

**Fig. 4A**

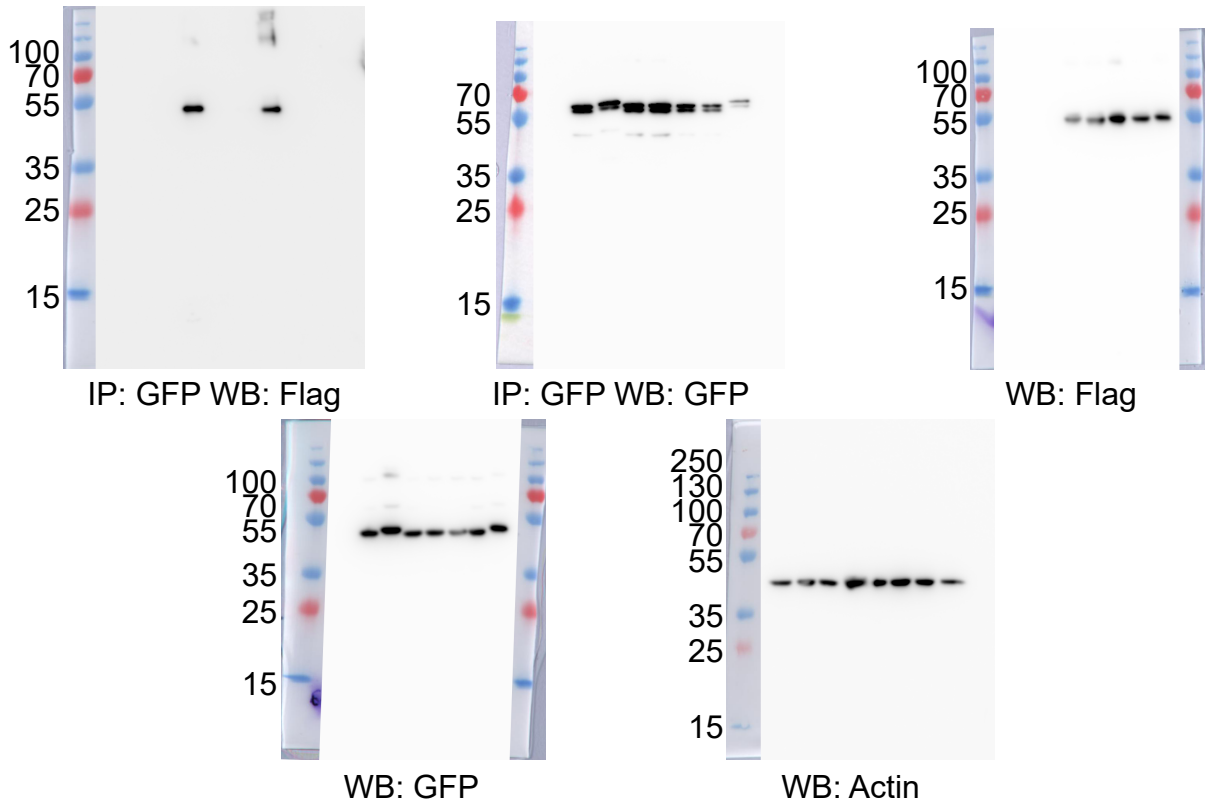

**Fig. 4B**

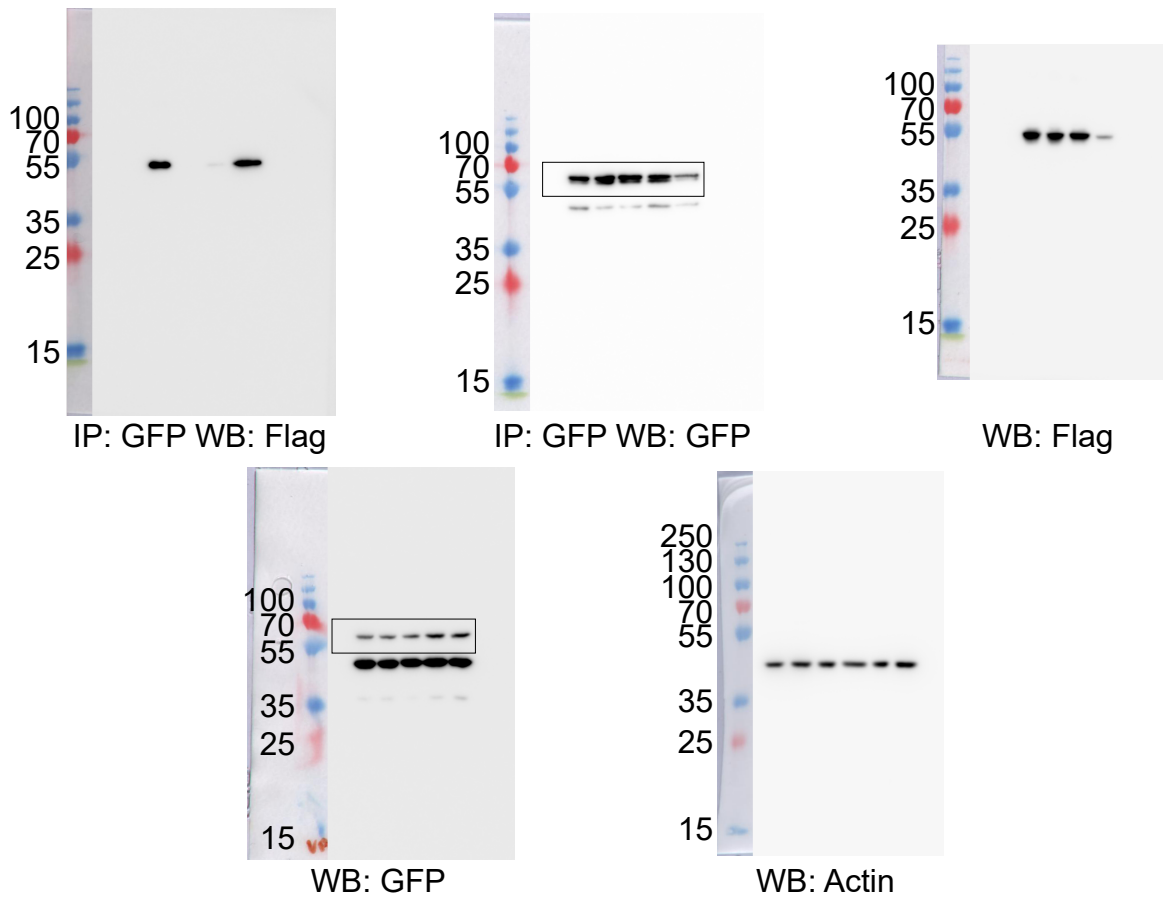

**Figure 4 Source data**

Supplement: EMBJ-39-e104369-s009.pdf [file EMBJ-39-e104369-s009.pdf]

**Fig. 5B**

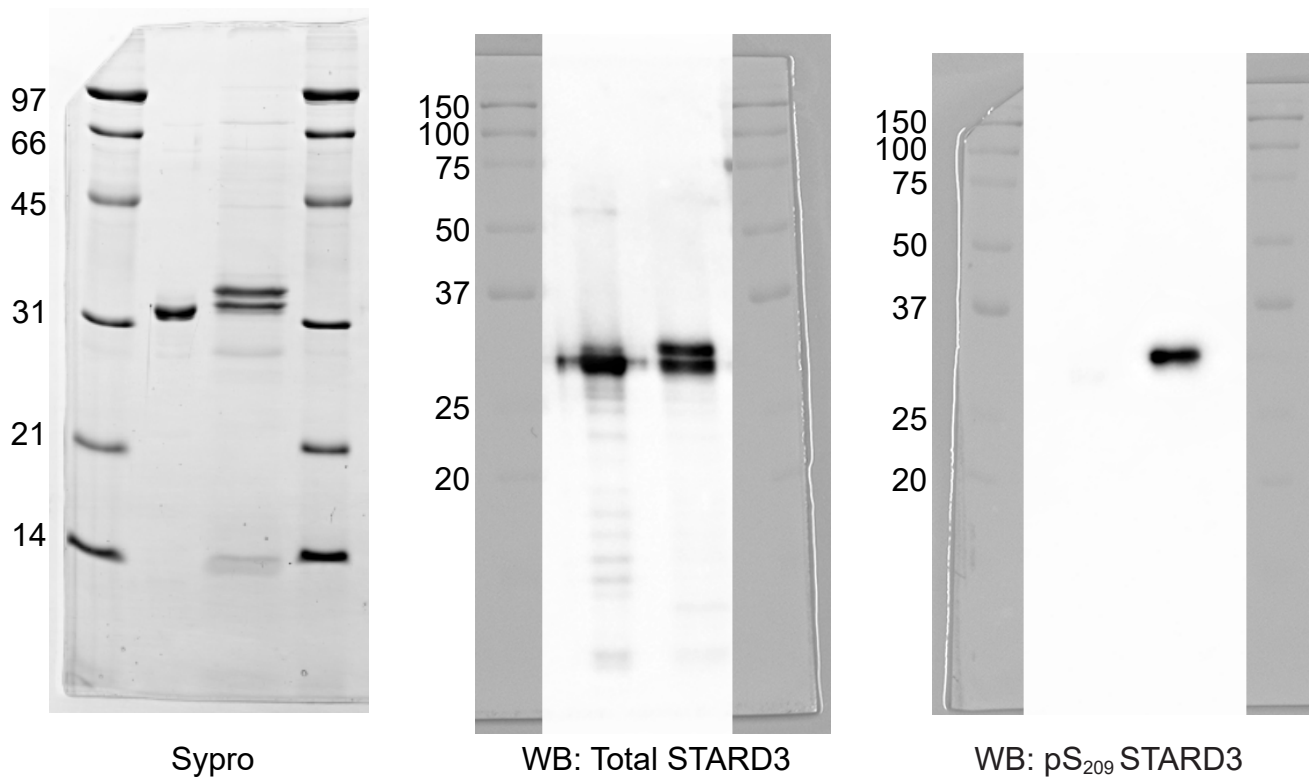

**Figure 5 Source data**

Supplement: EMBJ-39-e104369-s010.pdf [file EMBJ-39-e104369-s010.pdf]

**Fig. 7A**

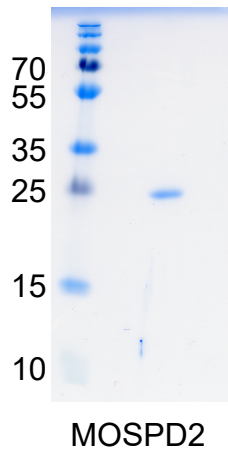

**Fig. 7B**

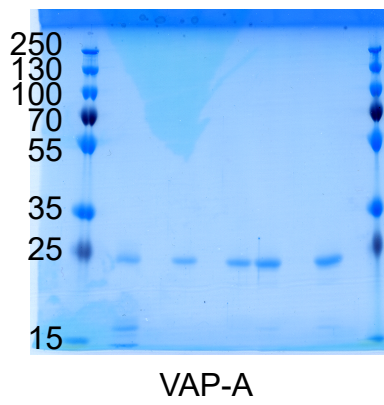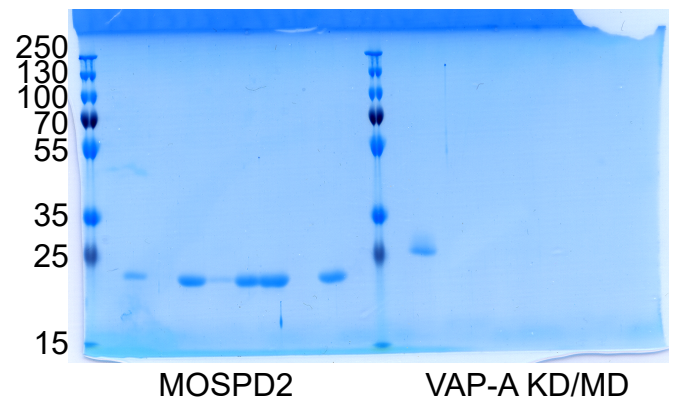

**Fig. 7F**

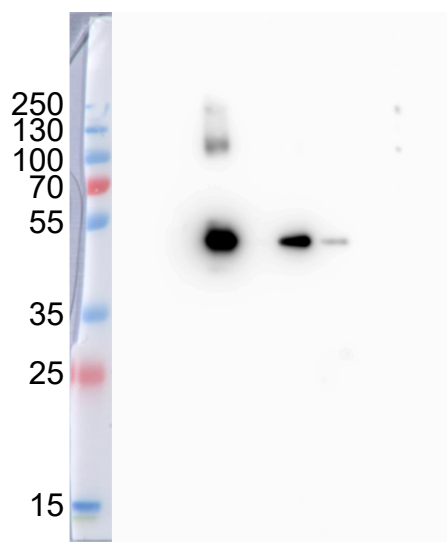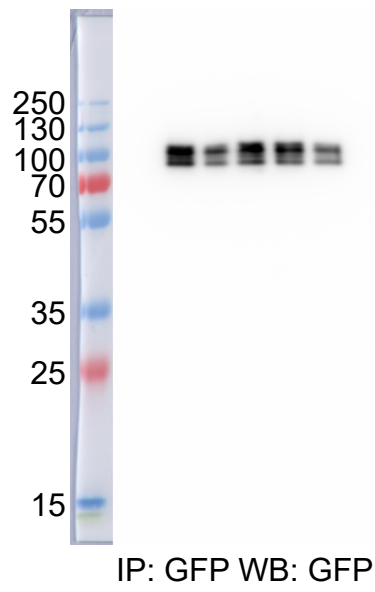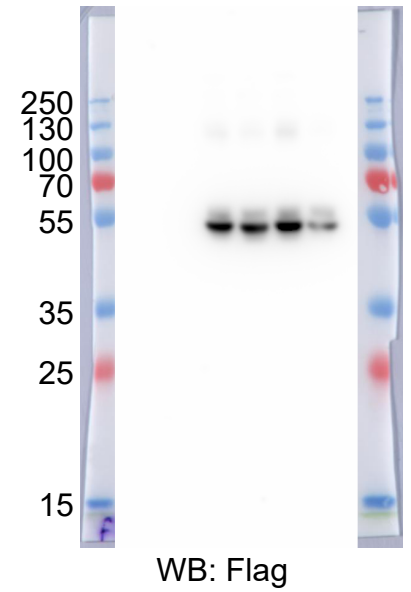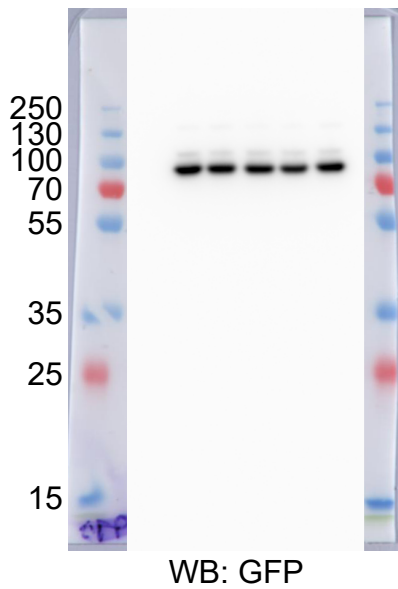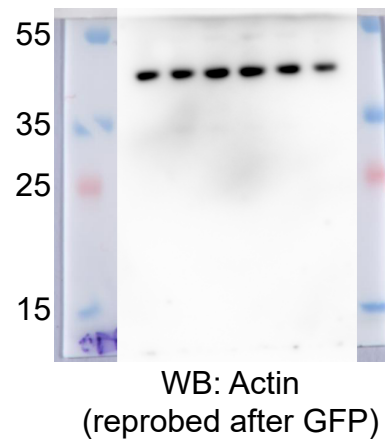

**Figure 7 Source data**

Supplement: EMBJ-39-e104369-s011.pdf [file EMBJ-39-e104369-s011.pdf]
